# Supplementary material for: High energy-storage performance of PLZS antiferroelectric multilayer ceramic capacitors
Source: Royal Society of Chemistry journal article supplement (doi:10.1039/c9qi01416k), 2019-12-09
Supplement: c9qi01416k1.pdf [file c9qi01416k1.pdf]

## Supplementary Information

### **High energy-storage performance in PLZS antiferroelectric multilayer ceramic capacitors**

Xiaohui Liu<sup>a,b</sup>, Yong Li<sup>a</sup>, Ningning Sun<sup>a</sup> and Xihong Hao<sup>a,b\*</sup>

<sup>a</sup> *Inner Mongolia Key Laboratory of Ferroelectric-related New Energy Materials and Devices, Inner Mongolia University of Science and Technology, Baotou 014010, China.*

<sup>b</sup> *Key Laboratory of Integrated Exploitation of Bayan Obo Multi-Metal Resources, Inner Mongolia University of Science and Technology, Baotou 014010, China*

E-mail: [xhhao@imust.cn](mailto:xhhao@imust.cn) (X. Hao)

\* Corresponding Author.

Table S1 The ratios of the component in the tape-casting slurry

| Function    | Component               | Content (wt%) |
|-------------|-------------------------|---------------|
| Powder      | PLZS                    | 59.6          |
| Solvent     | Toluene/ethanol         | 31.0          |
| Dispersant  | Phosphate ester         | 0.6           |
| Binder      | Polyvinyl butyral       | 5             |
| Plasticizer | Polyethylene glycol-400 | 1.2           |
| Plasticizer | Benzyl butyl phthalate  | 1.2           |
| Homogenizer | Cyclohexanone           | 1.4           |

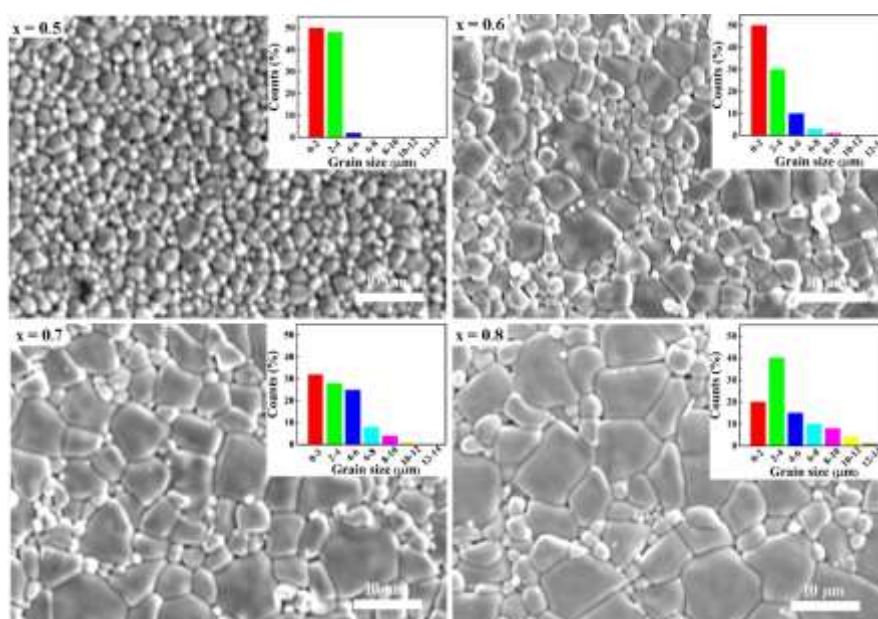

Fig. S1 SEM images of PLZS ceramics with different Zr contents and the corresponding grain size distributions.

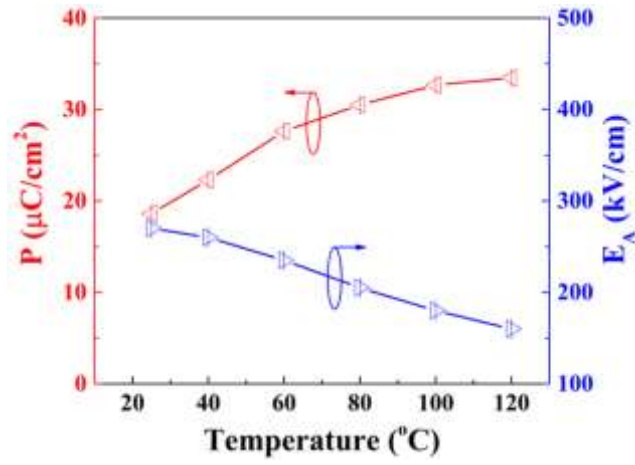

Fig. S2 The  $P_{\max}$  and  $E_A$  of the MLCC with  $x = 0.7$  with different temperature.

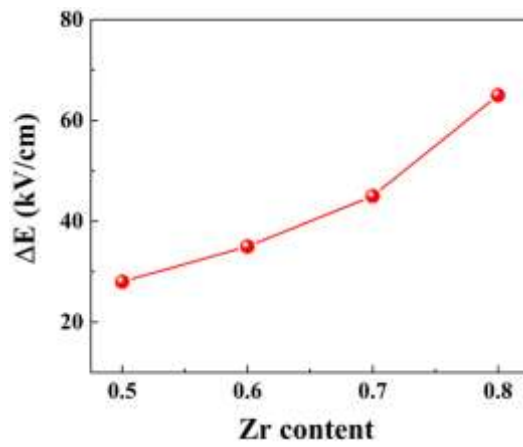

Fig. S3 The  $\Delta E$  of the PLZS ceramics with different Zr contents under the  $310 \text{ kV cm}^{-1}$ .

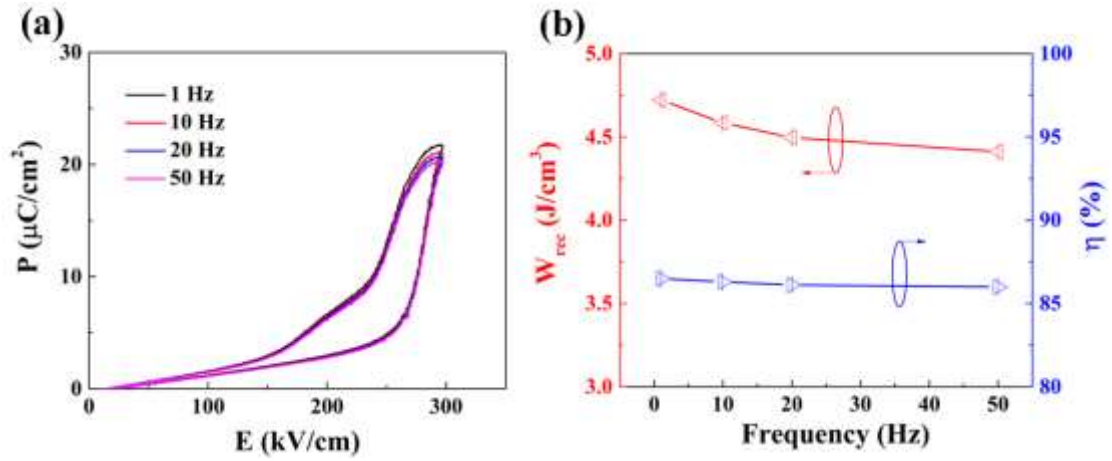

Fig. S4 Frequency-dependent  $P$ - $E$  loops of the MLCC with  $x = 0.7$  measured at  $300 \text{ kV cm}^{-1}$  and room temperature, (b) the corresponding  $W_{\text{rec}}$  and  $\eta$  at various frequencies.

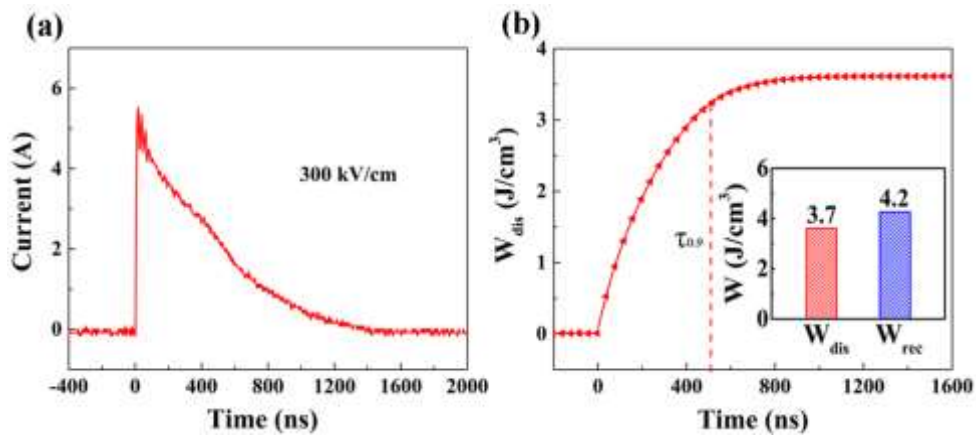

Fig. S5 (a) The pulsed discharge current of the MLCC with  $x = 0.7$  under  $300 \text{ kV cm}^{-1}$ . (b) The time dependence of the discharge energy density of the MLCC with  $x = 0.7$  under  $300 \text{ kV cm}^{-1}$ .
